# Supplementary material
Source: publisher figshare collection journal article supplement (https://acs.figshare.com/ndownloader/files/4201189)

# Confocal Microscopy Imaging of NR2B-Containing NMDA Receptors Based on Fluorescent Ifenprodil-Like Conjugates

*Patrice Marchand,<sup>1</sup> Javier Becerril-Ortega,<sup>2</sup> Laetitia Mony,<sup>3</sup> Cédric Bouteiller,<sup>1</sup> Pierre Paoletti,<sup>3</sup> Olivier Nicole,<sup>2</sup> Louisa Barré,<sup>1</sup> Alain Buisson,<sup>2</sup> Cécile Perrio\*<sup>1</sup>*

<sup>1</sup> CEA/DSV/I2BM/CI-NAPS, CNRS UMR6232, GDM-TEP, Université de Caen - Basse Normandie, Cyceron, Boulevard Henri Becquerel, 14074 Caen Cedex, France

<sup>2</sup> CI-NAPS, CNRS UMR6232, PSY, Université de Caen - Basse Normandie, Cyceron, Boulevard Henri Becquerel, 14074 Caen Cedex, France

<sup>3</sup> Institut de Biologie, CNRS UMR8197, INSERM U1024, Ecole Normale Supérieure, 46 rue d'Ulm, 75005 Paris, France

## SUPPORTING INFORMATION

### 1. CHEMISTRY

**General.** Dry THF and Et<sub>2</sub>O were displayed by using a MBraun SPS 800 solvent purification system. All other chemicals obtained from commercial suppliers were used as received. Reactions were purified by chromatography column with Merck silica gel Geduran Si 60 (0.040–0.063 nm). Thin layer chromatography (TLC) were carried out on silica gel 60 F254 (1.1 mm, Merck) with spot detection under UV light and appropriate staining reagent (I<sub>2</sub>, KMnO<sub>4</sub> or ninhydrin). Melting points (Mp) were obtained on an Electrothermal IA9000 capillary apparatus and are uncorrected. Nuclear magnetic resonance (NMR) spectra were recorded at room temperature on Bruker DPX 250 or DRX 400 spectrometers. The chemical shifts are calibrated to TMS ( $\delta$  H 0.00) or residual proton and carbon resonance of the solvent CDCl<sub>3</sub> ( $\delta$  H 7.26 and  $\delta$  C 77.16). Infrared (IR) spectra were recorded on a Thermo Nicolet 380 FT-IR instrument. Mass spectra were recorded on QTOF Micro Waters instruments. Elemental analyses were performed with a C, H, N, S, O Thermoquest apparatus. Analyses and semi-preparative purifications by high-performance liquid chromatography (HPLC) were performed on a Waters system, equipped with a 600 gradient pump and a photodiode array detector ( $\lambda$  210 to 750 nm) using a reverse-phase MS C18 Waters Bondapak column (7.8 x 300 mm, 10  $\mu$ m) eluting with acetonitrile (ACN) and aqueous trifluoroacetic acid (TFA, 0.1%, pH 2) [System A : ACN 20% (15 min), then linear gradient from 20 to 80% (20 min), then 80% (5 min), then linear gradient from 80 to 20% (5 min) and 20% (5 min) at a flow rate of 3

mL/min ; System B : ACN 25% (20 min), then linear gradient from 25 to 85% (30 min), then 85% (10 min), then linear gradient from 85 to 25% (10 min) and 25% (10 min) at a flow rate of 3 mL/min ; System C : ACN 0% (5 min), then linear gradient from 0 to 90% (45 min), then 90% (10 min), then linear gradient from 90 to 0% (10 min) and 0% (10 min) at a flow rate of 3 mL/min]. Ultraviolet (UV) absorption and fluorescence emission spectra were recorded on a Perkin-Elmer spectrophotometer LS 55 using ligands at 0.003 mM in solution in H<sub>2</sub>O containing 0.3% DMSO.

#### **tert-Butyl-6-[(1R\*,2R\*)-1-(4-benzyloxyphenyl)-2-(4-benzylpiperidin-1-yl)propylamino]hexylcarbamate (9)**

To a stirred solution of *O*-benzylated (*threo*)-ifenprodil<sup>1</sup> (2.1 g, 5 mmol) in dry THF (60 mL) was added triethylamine (2.1 mL, 15 mmol) at rt. After cooling to 0 °C, methanesulfonyl chloride (1 mL, 12.9 mmol) was added dropwise. The resulting reaction mixture became more visquous and stirring was maintained for 30 min at 0 °C. Triethylamine (1.4 mL, 10 mmol) then mono-Boc protected 1,6-hexyldiamine<sup>2</sup> (2.7 mg, 12.5 mmol) were added successively and the resulting mixture was stirred at 0 °C to rt for 20 h. The reaction mixture was partitioned between CH<sub>2</sub>Cl<sub>2</sub> and water. After separation and extraction with CH<sub>2</sub>Cl<sub>2</sub>, the combined organic layers were washed with saturated NaHCO<sub>3</sub> then brine, dried over MgSO<sub>4</sub> and concentrated under vacuum. The residue was purified by column chromatography over silica gel (ethyl acetate: heptane 50: 50) to yield the titled compound **9** as a white solid (2.70 g, 88%). Mp 98 °C. Rf 0.13 (heptane/ethyl acetate 50/50). <sup>1</sup>H NMR (CDCl<sub>3</sub>, 250 MHz) δ 7.39-7.07 (m, 12H), 6.84 (d, J = 8.8 Hz, 2H), 4.97 (s, 2H), 4.42 (bs, 2H), 3.21 (d, J = 9.8 Hz, 1H), 3.02-2.95 (m, 2H), 2.60-2.10 (m, 8H), 2.02-1.91 (m, 2H), 1.78-1.52 (m, 2H), 1.48-1.02 (m, 19H), 0.52 (d, J = 6.8 Hz, 3H). <sup>13</sup>C NMR (CDCl<sub>3</sub>, 62.9 MHz) δ 158.4, 156.4, 141.3, 137.6, 135.8, 129.7, 129.5, 128.9, 128.5, 128.3, 128.0, 126.1, 114.8, 79.4, 70.4, 66.0, 64.9, 53.2, 48.0, 44.6, 43.8, 41.0, 39.0, 33.6, 33.4, 30.5, 30.2, 28.9, 27.8, 27.4, 9.1. IR ν (cm<sup>-1</sup>) 3378, 3279, 2924, 1691, 1510, 1452, 1235, 1225, 1166, 730, 696. ESI<sup>+</sup>/MS/MS m/z (%) 614 ([M+H]<sup>+</sup>, 58), 398 (100). ESI<sup>+</sup>/HRMS calcd for C<sub>39</sub>H<sub>56</sub>N<sub>3</sub>O<sub>3</sub> 614.4322; found 614.4321. Anal. calcd for C<sub>39</sub>H<sub>55</sub>N<sub>3</sub>O<sub>3</sub> C, 76.31, H, 9.03, N, 6.85; found C, 76.57, H, 9.45, N, 7.12.

#### **4-{[(1R\*,2R\*)-1-(6-Aminohexylamino)-2-(4-benzylpiperidin-1-yl)]propyl}phenol (10)**

To a solution of compound **9** (298 mg, 0.486 mmol) in acetic acid (9 mL) was added HBr (47% in water, 0.4 mL, 7.2 mmol). The mixture was refluxed overnight. After cooling to rt, aqueous NaOH (3M) was added until pH 12. After extraction with CH<sub>2</sub>Cl<sub>2</sub>, the organic layer was dried over MgSO<sub>4</sub> then

<sup>1</sup> Chenard, B. L.; Shalaby, I. A.; Koe, B. K.; Ronau, R. T.; Butler, T. W.; Prochniak, M. A.; Schmidt, A. W.; Fox, C. B. *J. Med. Chem.* **1991**, 34, 3085.

<sup>2</sup> a) Morrell, A.; Placzek, M. S.; Steffen, J. D.; Antony, S.; Agama, K.; Pommier, Y.; Cushman, M. *J. Med. Chem.* **2007**, 50, 2040. b) Callahan, J. F.; Shton-Shue, D.; Bryan, H. G.; Bryan, W. M.; Heckman, G. D.; Kinter, L. B.; McDonald, J. E.; Moore, M. L.; Schmidt, D. B.; Silvestri, J. S. *J. Med. Chem.* **1989**, 32, 391.

concentrated under vacuum. The residue was purified by column chromatography over silica gel (CH<sub>2</sub>Cl<sub>2</sub>/MeOH/NH<sub>4</sub>OH 90/10/0.5) to yield the expected compound **10** as a white solid (118 mg, 57%). Mp 58 °C. Rf 0.29 (CH<sub>2</sub>Cl<sub>2</sub>/MeOH/NH<sub>4</sub>OH 80/20/0.5). <sup>1</sup>H NMR (CDCl<sub>3</sub>, 400 MHz) δ 7.32-7.28 (m, 2H), 7.22-7.15 (m, 5H), 6.74 (d, J = 8.4 Hz, 2H), 4.55 (bs, 4H), 3.32 (d, J = 10.0 Hz, 1H), 2.74-2.69 (m, 5H), 2.55 (d, J = 7.2 Hz, 2H), 2.53-2.33 (m, 3H), 2.10-2.00 (m, 1H), 1.75-1.62 (m, 2H), 1.53-1.33 (m, 5H), 1.31-1.12 (m, 6H), 0.63 (d, J = 6.4 Hz, 3H). <sup>13</sup>C NMR (CDCl<sub>3</sub>, 100.6 MHz) δ 157.3, 141.2, 130.0, 129.5, 128.6, 126.2, 116.2, 65.8, 64.0, 49.7, 47.3, 44.8, 43.7, 41.8, 33.3, 32.6, 29.3, 27.3, 26.7, 9.3. IR ν (cm<sup>-1</sup>) 3400, 2925, 1514, 1452, 1260, 1145, 834, 744, 698. ESI<sup>+</sup>/MS/MS m/z (%) 424 ([M+H]<sup>+</sup>, 24), 308 (100). ESI<sup>+</sup>/HRMS calcd for C<sub>27</sub>H<sub>42</sub>N<sub>3</sub>O 424.3328; found 424.3316. Hydrochloride salt of **10** was obtained as a white solid after stirring in diethyl ether (5 mL) with HCl in diethyl ether (1M, 2 mL) for 30 min. Anal. calcd for C<sub>27</sub>H<sub>41</sub>N<sub>3</sub>O<sub>3</sub>·3HCl C, 60.16, H, 9.35, N, 7.80, found C, 59.91, H, 8.79, N, 7.52.

***N*-{6-[(1R\*,2R\*)-2-(4-Benzylpiperidin-1-yl)-1-(4-hydroxyphenyl)propylamino]hexyl}-5-dimethylaminonaphthalene-1-sulfonamide (**4**)**

To a mixture of hydrochloride salt of phenylethylenediamine **10** (25 mg, 47 μmol) and triethylamine (35 μL, 250 μmol) in CH<sub>2</sub>Cl<sub>2</sub> (5 mL) cooled to -5 °C was added slowly dansyl chloride (13 mg, 46 μmol) in CH<sub>2</sub>Cl<sub>2</sub> (5 mL). The final solution was stirred at -5 °C for 7 h and concentrated under reduced pressure. The residue was purified by column chromatography over silica gel (CH<sub>2</sub>Cl<sub>2</sub>/MeOH/NH<sub>4</sub>OH 90/10/0.1) to yield **4** as a beige solid (14 mg, 47%). Rf 0.45 (CH<sub>2</sub>Cl<sub>2</sub>/MeOH/NH<sub>4</sub>OH 90/10/0.1). t<sub>R</sub> 29.0 min (HPLC system A). ESI<sup>+</sup>/MS/MS m/z (%) 657.4 ([M+H]<sup>+</sup>, 100), 308.2 (72). ESI<sup>+</sup>/HRMS calcd for C<sub>39</sub>H<sub>53</sub>N<sub>4</sub>O<sub>3</sub>S 657.3838; found 657.3809.

***N*-{6-[(1R\*,2R\*)-2-(4-Benzylpiperidin-1-yl)-1-(4-hydroxyphenyl)propylamino]hexyl}-5(6)-fluoresceincarboxamide (**5**)**

To a solution of 5-carboxyfluorescein *N*-succinimidyl ester (4.5 mg, 9.7 μmol) in *N*-methyl-2-pyrrolidinone NMP (200 μL) was added a solution of phenylethylenediamine **10** (5 mg, 11.8 μmol) and *N,N*-diisopropylethylamine DIEA (10 μL, 59 μmol) in 200 μL of NMP. The reaction was protected from the light with aluminium foil and stirred at rt for 18 h. The reaction mixture was diluted with water (2.5 mL) and purified by semi-preparative HPLC (injection volumes 600-700 μL) to yield **5** as a yellow powder after being lyophilized (4.5 mg, 46%). HPLC purity > 95%; t<sub>R</sub> 24.1 min (system C). ESI<sup>+</sup>/MS/MS m/z (%) 780.4 ([M(C<sub>48</sub>H<sub>51</sub>N<sub>3</sub>O<sub>7</sub>)+H]<sup>+</sup>, 100), 473.2 (20). ESI<sup>+</sup>/HMRS calcd for C<sub>48</sub>H<sub>52</sub>N<sub>3</sub>O<sub>7</sub> (MH<sup>+</sup>) 782.3805, found 782.3789.

***N*-(*N*-{6-[(1*R*\*,2*R*\*)-2-(4-Benzylpiperidin-1-yl)-1-(4-hydroxyphenyl)propylamino]hexyl}-5-aminocarbonylpentyl)-5(6)-fluoresceincarboxamide (6)**

To a solution of 6-[fluorescein-5(6)-carboxamido]hexanoic acid *N*-hydroxysuccinimidyl ester (6.1 mg, 10.4  $\mu$ mol) in *N*-methyl-2-pyrrolidinone NMP (150  $\mu$ L) was added a solution of phenylethylenediamine **10** (5.3 mg, 9.8  $\mu$ mol) and *N,N*-diisopropylethylamine DIEA (3.5  $\mu$ L, 20.2  $\mu$ mol) in 200  $\mu$ L of NMP. The reaction was protected from the light with aluminium foil and stirred at rt for 18 h. The reaction mixture was diluted with water (2.3 mL) and purified by semi-preparative HPLC (injection volumes 600-800  $\mu$ L) to yield **6** as a yellow powder after being lyophilized (5 mg, 45%). HPLC purity > 95%;  $t_R$  24.3 min (system C). ESI<sup>+</sup>/MS/MS  $m/z$  (%) 895.8 ([M(C<sub>54</sub>H<sub>62</sub>N<sub>4</sub>O<sub>8</sub>)+H]<sup>+</sup>, 65), 588.5 (20), 308.3 (100). ESI<sup>+</sup>/HMRS calcd for C<sub>54</sub>H<sub>63</sub>N<sub>4</sub>O<sub>8</sub> (MH<sup>+</sup>) 895.4646, found 895.4666.

**2-{5-[-1-(6-{6-[(1*R*\*,2*R*\*)-2-(4-Benzylpiperidin-1-yl)-1-(4-hydroxyphenyl)propylamino]hexyl}-5-aminocarbonylpentyl-3,3-dimethyl-5-sulfo-1,3-dihydro-2*H*-indol-2-ylidene]penta-1,3,5-trienyl}-1-ethyl-3,3-dimethyl-5-sulfo-3*H*-indolinium (7)**

To a mixture of cyanine (Cy5) dye succinimidyl ester<sup>3</sup> Cy5.0-CO<sub>2</sub>Su (4.6 mg, 6.09  $\mu$ mol) in *N*-methyl-2-pyrrolidinone NMP (100  $\mu$ L) was added a solution of NMP (100  $\mu$ L) containing the hydrochloride salt of phenylethylenediamine **10** (3.9 mg, 7.3  $\mu$ mol) and *N,N*-diisopropylethylamine DIEA (5.0  $\mu$ L, 30.5  $\mu$ mol). The reaction was protected from the light and stirred at rt for 3h. The reaction mixture was purified by semi-preparative HPLC to yield **7** as a blue powder after being lyophilized (4.1 mg, 53%). HPLC purity > 95%;  $t_R$  32.6 min (system B). ESI<sup>+</sup>/MS/MS  $m/z$  (%) 553.9 ([M(C<sub>60</sub>H<sub>78</sub>N<sub>5</sub>O<sub>8</sub>S<sub>2</sub>)+2Na]<sup>2+</sup>, 23), 542.9 ([M+Na+H]<sup>2+</sup>, 53), 531.9 ([M+2H]<sup>2+</sup>, 100).

<sup>3</sup> Mujumdar, R. B.; Ernst, L. A.; Mujumdar, S. R.; Lewis, C. J.; Waggoner, A. S. *Bioconjugate Chem.* **1993**, 4, 105.

## HPLC Chromatogram for dansyl-ligand 4

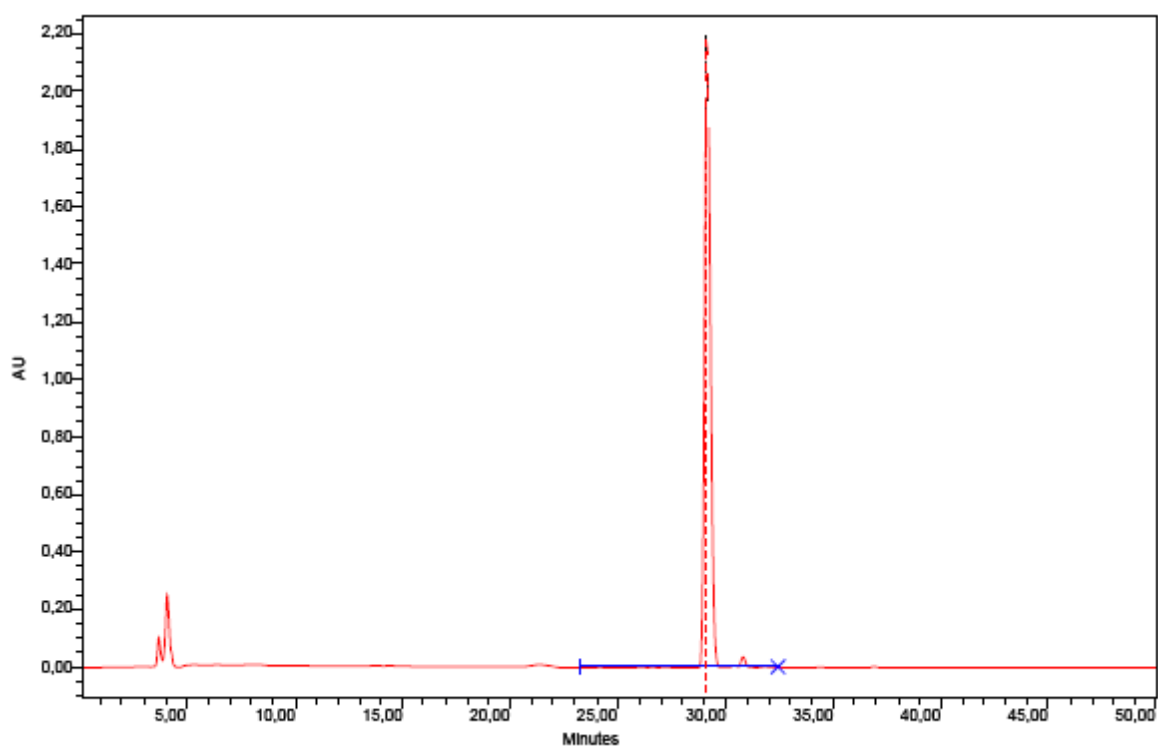

## Mass spectrum for dansyl-ligand 4

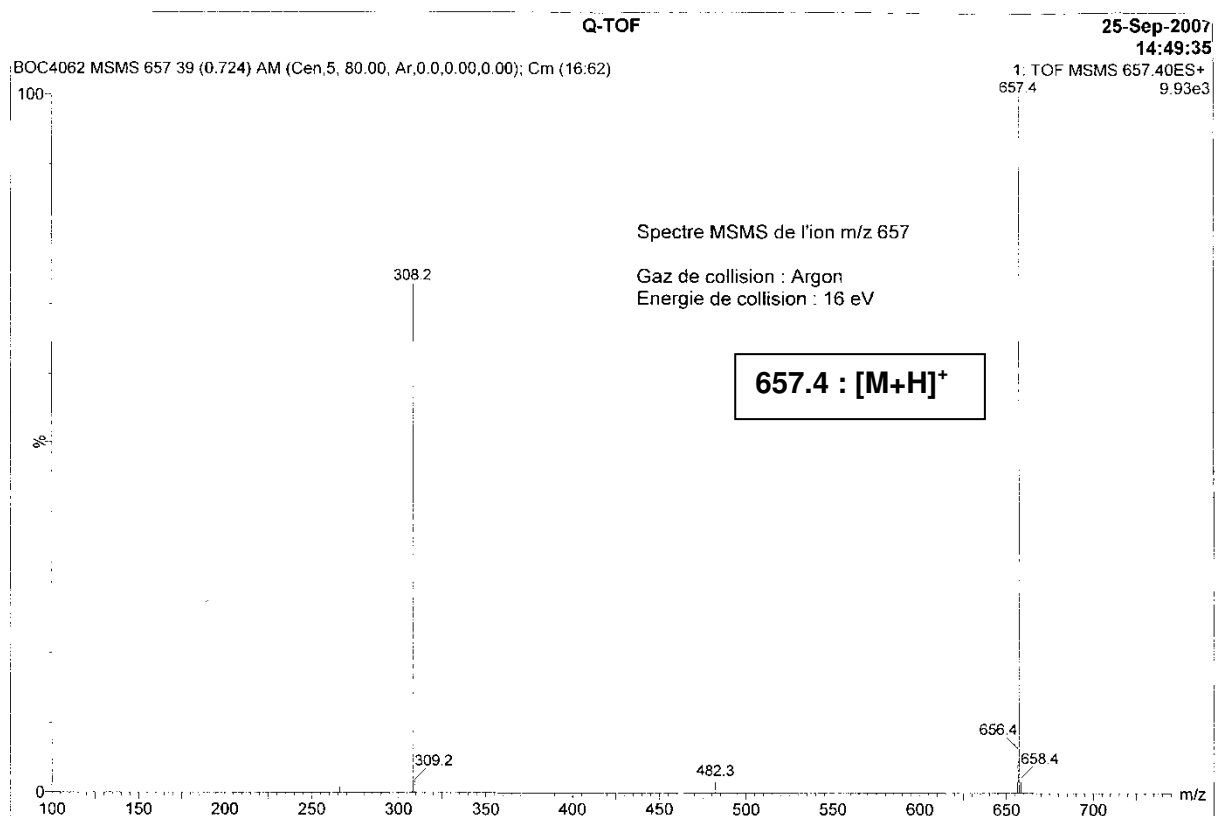

## HPLC Chromatogram for fluorescein-ligand 5

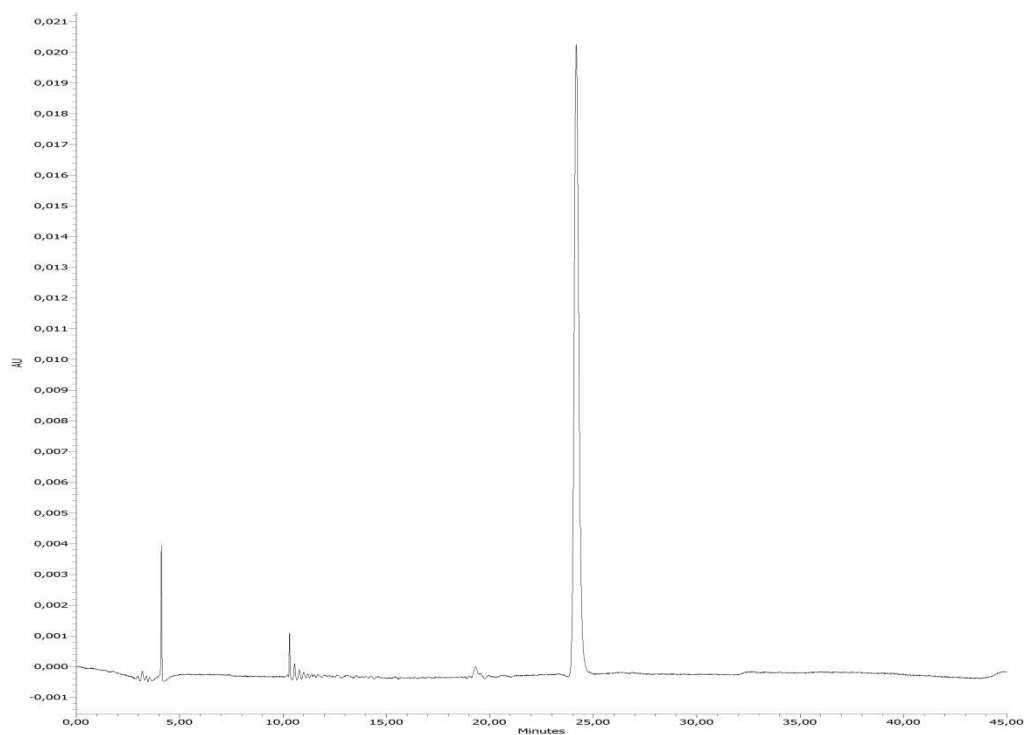

## Mass spectrum for fluorescein-ligand 5

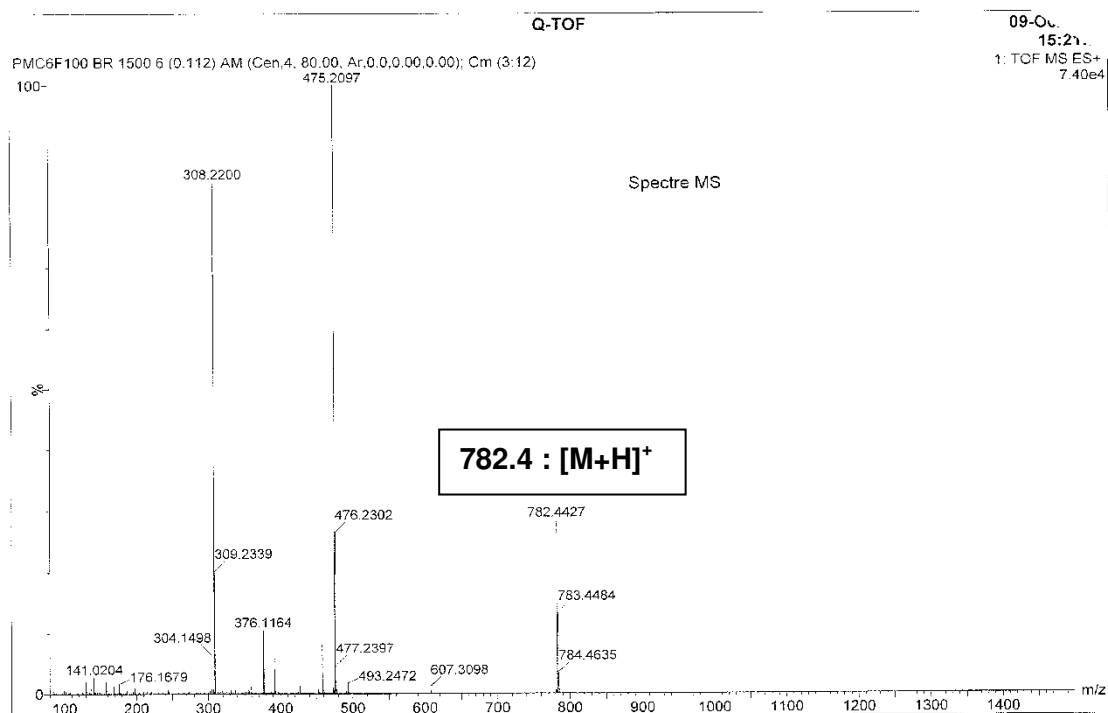

## HPLC Chromatogram for fluorescein-ligand 6

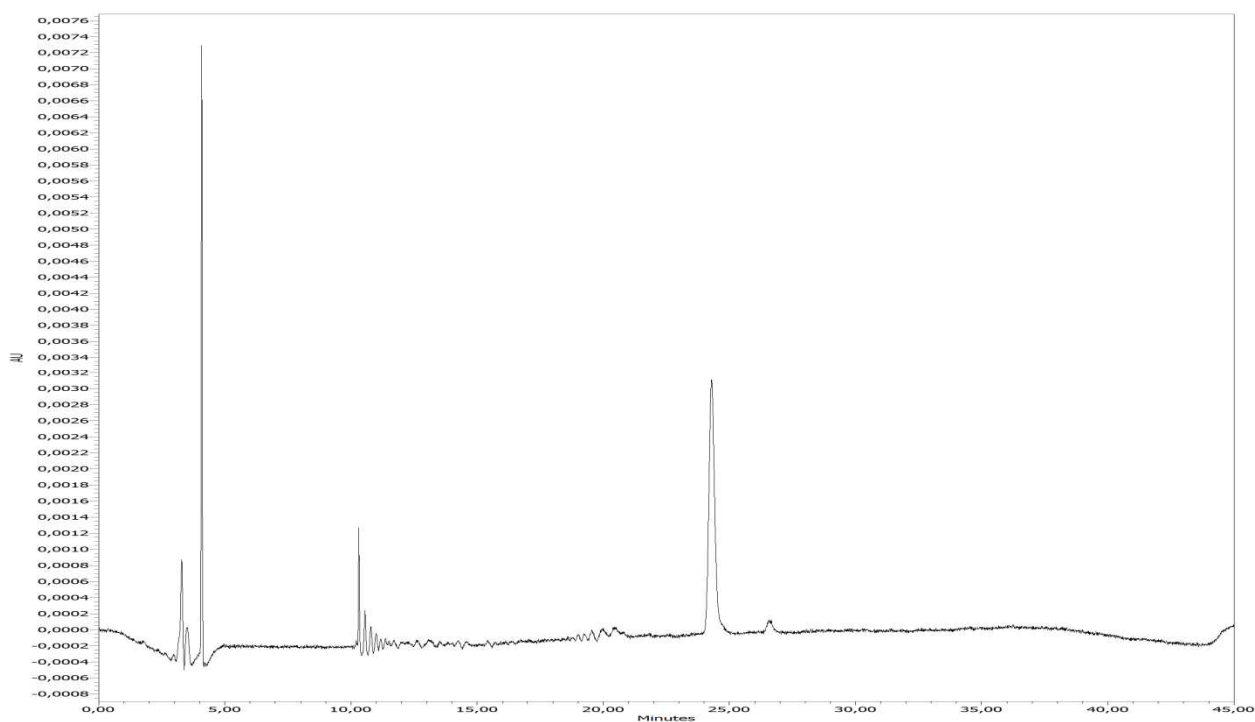

## Mass spectrum for fluorescein-ligand 6

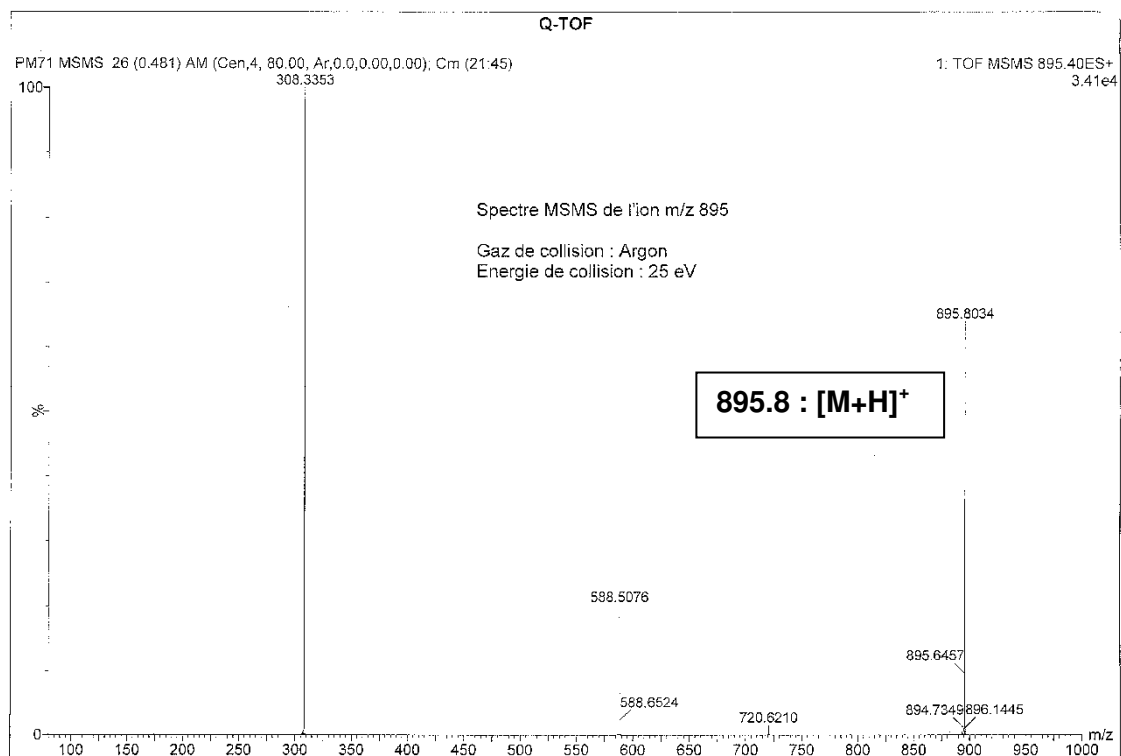

## HPLC Chromatogram for Cy5-ligand 7

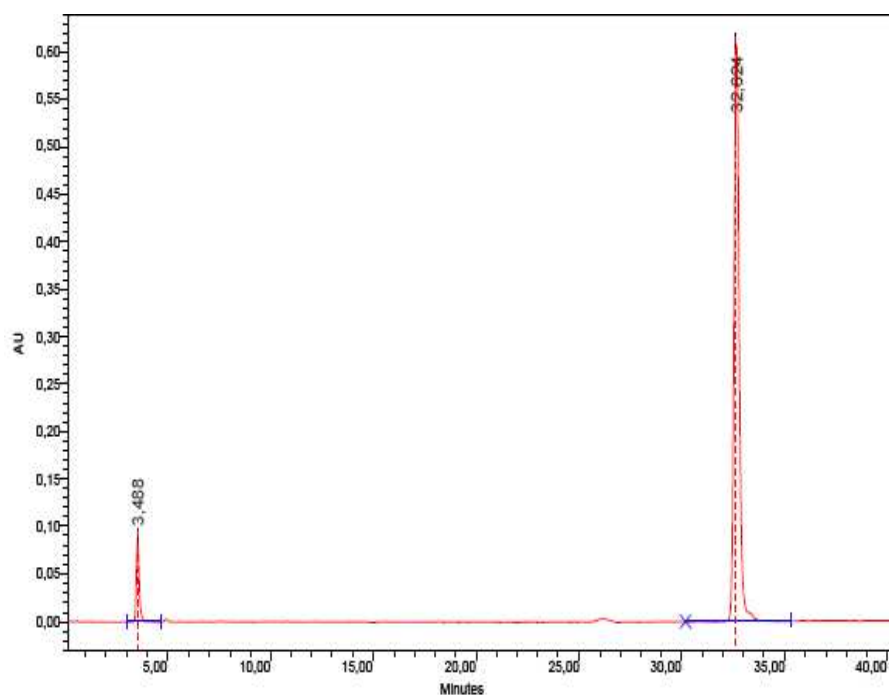

## Mass spectrum for Cy5-ligand 7

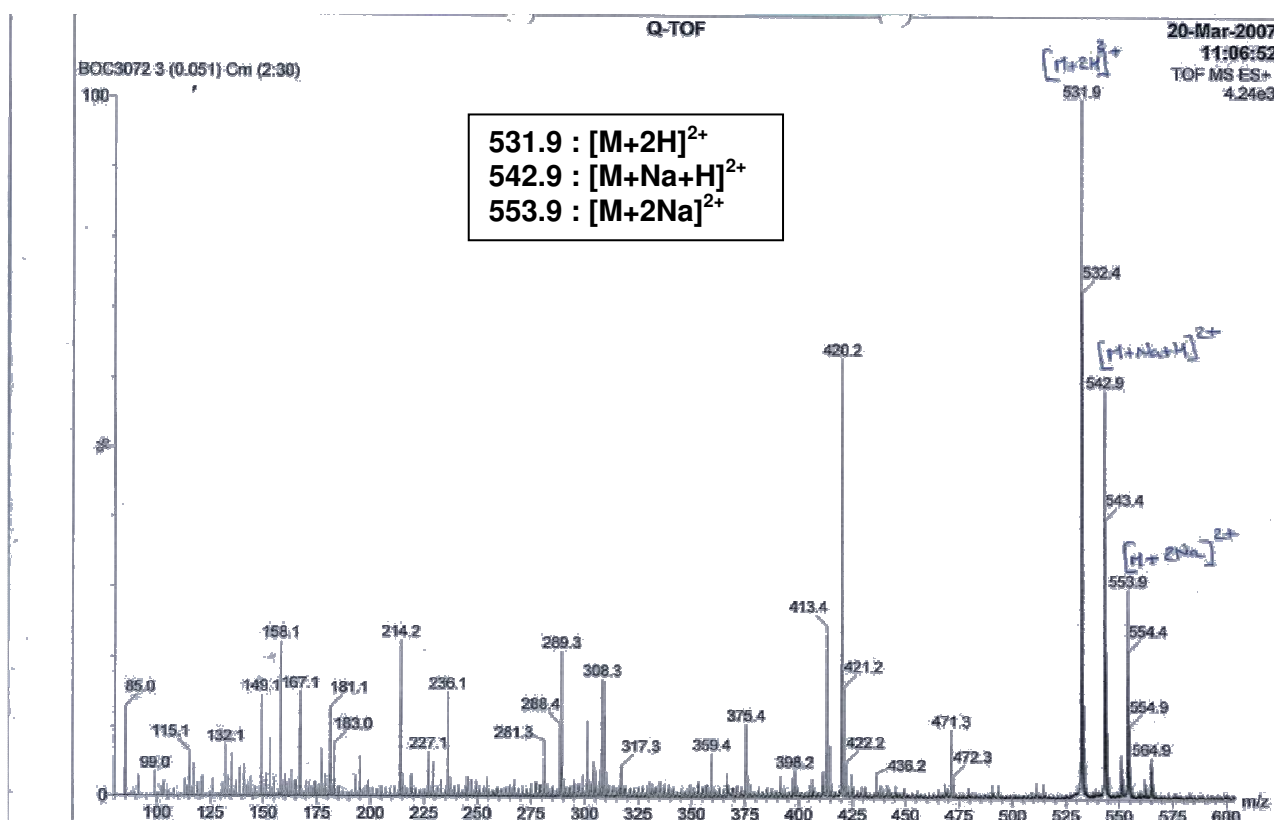

Supplement: Supplementary file 1 [file 4201189]
